# Supplementary material
Source: publisher figshare collection journal article supplement (https://wiley.figshare.com/articles/dataset/_/3567633)
Supplement: Supplementary file 1 [file 1 › appendix-A.htm]

Ecological Archives M081-006-A1


### *Ecological Archives* M081-006-A1

### **John F. Bruno, Stephen P. Ellner, Ivana Vu, Kiho Kim, and C. Drew Harvell. 2011. Impacts of aspergillosis on sea fan coral demography: modeling a moving target. *Ecological Monographs* 81:123–139.**

Appendix A. Estimating height–area relationships.

> View / download PDF.

---


[Back to M081-006]
