# Supplementary material
Source: publisher figshare collection journal article supplement (https://wiley.figshare.com/articles/dataset/_/3567633)
Supplement: Supplementary file 1 [file 1 › appendix-A.pdf]

**John F. Bruno, Stephen P. Ellner, Ivana Vu, Kiho Kim, and C. Drew Harvell.  
2011. Impacts of aspergillosis on sea fan coral demography: modeling a  
moving target. *Ecological Monographs* 81:123–139.**

## Appendix A. Estimating height-area relationships.

The population model's individual size variable is  $x=(\text{healthy tissue area})^{1/3}$ . For some comparisons with data we converted predicted size distributions  $n(x)$  to the corresponding area or height distributions, as follows. The number of colonies with area  $A$  less than some value  $a$  is the number with size  $x$  less than  $a^{1/3}$ . The distribution for area is therefore

$$N(a) = \frac{d}{da} \int_0^{a^{1/3}} n(x) dx = \frac{1}{3} a^{-2/3} n(a^{1/3}). \quad (\text{A.1})$$

We estimated the relationship between area and height using 257 fans at the Half Moon and Yal Ku, Yucatan sites ranging from 3 to 74 cm in height, for which simultaneous measurements of height and area were taken. These data were fitted well by the allometric relationship

$$\log(\text{Height}) = 0.25 + 0.5 \times \log(\text{Area}) \quad (\text{A.2})$$

with height in cm, area in  $\text{cm}^2$  (the coefficients in Eq. A.2 were obtained by linear regression on log-log scale, followed by a small rounding off of insignificant digits). On arithmetic scale, the relationship is (again rounding off insignificant digits)

$$\text{Height} = 1.3 \sqrt{\text{Area}}. \quad (\text{A.3})$$

Equation A.3 is the relationship between height (major axis) and area for an ellipse with major axis about 40% longer than the minor axis. Using Eq. A.3 the number of colonies with height  $H$  less than some value  $h$  is the number with  $1.3 \sqrt{\text{Area}} = 1.3x^{3/2}$  less than  $h$ ,

which is the number with  $x$  less than  $\left(\frac{h}{1.3}\right)^{2/3} = 0.67h^{2/3}$ . The distribution for  $h$  is

therefore

$$N(h) = \frac{d}{dh} \int_0^{0.67h^{2/3}} n(x) dx = 0.67 \times \frac{2}{3} h^{-1/3} n(0.67h^{2/3}) \approx 0.45 h^{-1/3} n(0.67h^{2/3}) . \quad (\text{A.4})$$
